# Supplementary material for: CRASH-IT Switch Enables Reversible and Dose-Dependent Control of TCR and CAR T-cell Function
Source: Oxford University Press journal article supplement (doi:10.1158/2326-6066.cir-21-0095), 2021-06-30
Supplement: 23266066cir210095-sup-260332_2_supp_7211775_qv7zbl.xlsx [file 23266066cir210095-sup-260332_2_supp_7211775_qv7zbl.xlsx]

## Sheet: Sheet1
Supplementary Table S1. CRASH-IT switches, variant constructs lacking one or more functional domains and codon optimized DNA sequences encoding such constructs.
Construct Number	Insert	Vector	Description	Domains	Protein stability control domain	Figures	Codon optimized insert sequence	Insert length (bp)
1	Zap70 2xSH2-PD1 tail	MP71-(insert)-IRES-EGFP	Strong constitutive inhibitor of T-cell functions, CRASH-IT without potein stability control domain	Human Zap70 fragment (P43403, 1–264 aa), a GGS linker, the human PD1 intracellular domain (Q15116, 192–288 aa)	None	Fig. 1C-I	ATGCCTGATCCTGCCGCCCATCTGCCATTCTTCTACGGCAGCATCAGCAGAGCCGAGGCCGAGGAACACCTGAAGCTGGCCGGAATGGCCGACGGCCTGTTCCTGCTGAGACAGTGCCTGAGAAGCCTGGGCGGCTACGTGCTGAGCCTGGTGCACGATGTGCGGTTCCACCACTTCCCCATCGAGCGGCAGCTGAACGGCACCTACGCTATCGCTGGCGGCAAGGCCCATTGTGGACCTGCCGAGCTGTGCGAGTTCTACAGCAGAGATCCCGATGGCCTGCCCTGCAACCTGCGGAAGCCCTGCAATAGACCCAGCGGCCTGGAACCTCAGCCCGGCGTGTTCGACTGTCTGAGGGATGCCATGGTGCGCGACTACGTGCGGCAGACCTGGAAGCTG…	1092
2	Zap70 (2xSH2 only)	MP71-(insert)-IRES-EGFP	Weak constitutive inhibitor of T-cell functions, 2xSH2 Zap70 domain competes with endogenous full-length Zap70	Zap70 (1–264 aa)	None	Fig. 1C-D	ATGCCTGATCCTGCCGCCCATCTGCCATTCTTCTACGGCAGCATCAGCAGAGCCGAGGCCGAGGAACACCTGAAGCTGGCCGGAATGGCCGACGGCCTGTTCCTGCTGAGACAGTGCCTGAGAAGCCTGGGCGGCTACGTGCTGAGCCTGGTGCACGATGTGCGGTTCCACCACTTCCCCATCGAGCGGCAGCTGAACGGCACCTACGCTATCGCTGGCGGCAAGGCCCATTGTGGACCTGCCGAGCTGTGCGAGTTCTACAGCAGAGATCCCGATGGCCTGCCCTGCAACCTGCGGAAGCCCTGCAATAGACCCAGCGGCCTGGAACCTCAGCCCGGCGTGTTCGACTGTCTGAGGGATGCCATGGTGCGCGACTACGTGCGGCAGACCTGGAAGCTG…	792
3	PD1 tail only	MP71-(insert)-IRES-EGFP	PD1 tail	MV (i.e. start codon methionine plus an additional valine to generate a Kozak sequence), and the human PD1 intracellular domain (192–288 aa)	None	Fig. 1C-D	ATGGTGTGTTCTAGAGCCGCCAGAGGAACCATCGGCGCCAGAAGAACAGGCCAGCCCCTGAAAGAAGATCCCAGCGCCGTGCCCGTGTTCAGCGTGGACTATGGCGAGCTGGACTTCCAGTGGCGGGAAAAGACCCCCGAGCCTCCTGTGCCTTGTGTGCCTGAGCAGACCGAGTACGCCACCATCGTGTTCCCTAGCGGCATGGGCACAAGCAGCCCTGCCAGAAGAGGCAGCGCTGACGGACCTAGATCTGCCCAGCCTCTGAGGCCTGAGGATGGCCACTGTAGCTGGCCTCTG	297
4	HA-Zap70-PD1-SMASh	MP71-(insert)-IRES-EGFP	Hemagglutinin (HA)-tagged asunaprevir/grazoprevir regulated CRASH-IT switch	HA tag (MVYPYDVPDYAGSGV) followed by Zap70-PD1-SMASh	SMASh	Fig. 2C-D	ATGGTGTACCCCTACGACGTGCCCGATTATGCCGGCAGCGGCGTGCCTGATCCTGCCGCCCATCTGCCATTCTTCTACGGCAGCATCAGCAGAGCCGAGGCCGAGGAACACCTGAAGCTGGCCGGAATGGCCGACGGCCTGTTCCTGCTGAGACAGTGCCTGAGAAGCCTGGGCGGCTACGTGCTGAGCCTGGTGCACGATGTGCGGTTCCACCACTTCCCCATCGAGCGGCAGCTGAACGGCACCTACGCTATCGCTGGCGGCAAGGCCCATTGTGGACCTGCCGAGCTGTGCGAGTTCTACAGCAGAGATCCCGATGGCCTGCCCTGCAACCTGCGGAAGCCCTGCAATAGACCCAGCGGCCTGGAACCTCAGCCCGGCGTGTTCGACTGTCTGAGG…	2061
5	Zap70-PD1-SMASh	MP71-(insert)-IRES-EGFP	Asunaprevir/grazoprevir regulated CRASH-IT switch	Zap70 (1–264 aa), a GGS linker, the PD1 intracellular domain (192–288 aa), an SGGGS linker, and the 304 aa SMASh tag	SMASh	Fig. 2E, 3C, 3E, 4C-D, Supplementary Fig. S1A, S2A, S2C, S3B-D, S4A, S5A-B, S6A-B, S6D	ATGCCTGATCCTGCCGCCCATCTGCCATTCTTCTACGGCAGCATCAGCAGAGCCGAGGCCGAGGAACACCTGAAGCTGGCCGGAATGGCCGACGGCCTGTTCCTGCTGAGACAGTGCCTGAGAAGCCTGGGCGGCTACGTGCTGAGCCTGGTGCACGATGTGCGGTTCCACCACTTCCCCATCGAGCGGCAGCTGAACGGCACCTACGCTATCGCTGGCGGCAAGGCCCATTGTGGACCTGCCGAGCTGTGCGAGTTCTACAGCAGAGATCCCGATGGCCTGCCCTGCAACCTGCGGAAGCCCTGCAATAGACCCAGCGGCCTGGAACCTCAGCCCGGCGTGTTCGACTGTCTGAGGGATGCCATGGTGCGCGACTACGTGCGGCAGACCTGGAAGCTG…	2019
6	Zap70(2xSH2)-SMASh	MP71-(insert)-IRES-EGFP	Asunaprevir/grazoprevir regulated switch without PD1 tail	Zap70 (1–264 aa), an SGGGS linker, and the 304 aa SMASh tag	SMASh	Supplementary Fig. S4B	ATGCCTGATCCTGCCGCCCATCTGCCATTCTTCTACGGCAGCATCAGCAGAGCCGAGGCCGAGGAACACCTGAAGCTGGCCGGAATGGCCGACGGCCTGTTCCTGCTGAGACAGTGCCTGAGAAGCCTGGGCGGCTACGTGCTGAGCCTGGTGCACGATGTGCGGTTCCACCACTTCCCCATCGAGCGGCAGCTGAACGGCACCTACGCTATCGCTGGCGGCAAGGCCCATTGTGGACCTGCCGAGCTGTGCGAGTTCTACAGCAGAGATCCCGATGGCCTGCCCTGCAACCTGCGGAAGCCCTGCAATAGACCCAGCGGCCTGGAACCTCAGCCCGGCGTGTTCGACTGTCTGAGGGATGCCATGGTGCGCGACTACGTGCGGCAGACCTGGAAGCTG…	1719
7	Zap70-PD1-SMASh-delta	MP71-(insert)-IRES-EGFP	Zap70-PD1-SMASh construct without a degron sequence	Last 78 aa of the SMASh tag from Zap70-PD1-SMASh construct were deleted	SMASh	Supplementary Fig. S4C	ATGCCTGATCCTGCCGCCCATCTGCCATTCTTCTACGGCAGCATCAGCAGAGCCGAGGCCGAGGAACACCTGAAGCTGGCCGGAATGGCCGACGGCCTGTTCCTGCTGAGACAGTGCCTGAGAAGCCTGGGCGGCTACGTGCTGAGCCTGGTGCACGATGTGCGGTTCCACCACTTCCCCATCGAGCGGCAGCTGAACGGCACCTACGCTATCGCTGGCGGCAAGGCCCATTGTGGACCTGCCGAGCTGTGCGAGTTCTACAGCAGAGATCCCGATGGCCTGCCCTGCAACCTGCGGAAGCCCTGCAATAGACCCAGCGGCCTGGAACCTCAGCCCGGCGTGTTCGACTGTCTGAGGGATGCCATGGTGCGCGACTACGTGCGGCAGACCTGGAAGCTG…	1785
8	tuZap70-PD1-SMASh	MP71-(insert)-IRES-EGFP	Tuned CRASH-IT switch, slightly weaker T-cell inhibition	An additional alanine was added after the start codon followed by Zap70-PD1-SMASh	SMASh	Supplementary Fig. S5A-C	ATGGCTCCTGATCCTGCCGCCCATCTGCCATTCTTCTACGGCAGCATCAGCAGAGCCGAGGCCGAGGAACACCTGAAGCTGGCCGGAATGGCCGACGGCCTGTTCCTGCTGAGACAGTGCCTGAGAAGCCTGGGCGGCTACGTGCTGAGCCTGGTGCACGATGTGCGGTTCCACCACTTCCCCATCGAGCGGCAGCTGAACGGCACCTACGCTATCGCTGGCGGCAAGGCCCATTGTGGACCTGCCGAGCTGTGCGAGTTCTACAGCAGAGATCCCGATGGCCTGCCCTGCAACCTGCGGAAGCCCTGCAATAGACCCAGCGGCCTGGAACCTCAGCCCGGCGTGTTCGACTGTCTGAGGGATGCCATGGTGCGCGACTACGTGCGGCAGACCTGGAAG…	2022
9	Zap70-PD1-FKBP12F36V	MP71-(insert)-IRES-EGFP	dTAG-13 PROTAC regulated CRASH-IT switch	Zap70 (1–264 aa), a GGS linker, the PD1 intracellular domain (192–288 aa), an SGGGS linker, and the 107 aa FKBP12F36V	FKBP12F36V	Fig. 4E-F, 4H-I, Supplementary Fig. S6C, S7D, S8A, S8C, S8E, S8G	ATGCCTGATCCTGCCGCCCATCTGCCATTCTTCTACGGCAGCATCAGCAGAGCCGAGGCCGAGGAACACCTGAAGCTGGCCGGAATGGCCGACGGCCTGTTCCTGCTGAGACAGTGCCTGAGAAGCCTGGGCGGCTACGTGCTGAGCCTGGTGCACGATGTGCGGTTCCACCACTTCCCCATCGAGCGGCAGCTGAACGGCACCTACGCTATCGCTGGCGGCAAGGCCCATTGTGGACCTGCCGAGCTGTGCGAGTTCTACAGCAGAGATCCCGATGGCCTGCCCTGCAACCTGCGGAAGCCCTGCAATAGACCCAGCGGCCTGGAACCTCAGCCCGGCGTGTTCGACTGTCTGAGGGATGCCATGGTGCGCGACTACGTGCGGCAGACCTGGAAGCTG…	1428
10	HA-Zap70-PD1-FKBP12F36V	MP71-(insert)-IRES-EGFP	Hemagglutinin (HA)-tagged dTAG-13 PROTAC regulated CRASH-IT switch	HA tag (MVYPYDVPDYAGSGV) followed by Zap70-PD1-FKBP12F36V	FKBP12F36V	Supplementary Fig. S7A-B	ATGGTGTACCCCTACGACGTGCCCGATTATGCCGGCAGCGGCGTGCCTGATCCTGCCGCCCATCTGCCATTCTTCTACGGCAGCATCAGCAGAGCCGAGGCCGAGGAACACCTGAAGCTGGCCGGAATGGCCGACGGCCTGTTCCTGCTGAGACAGTGCCTGAGAAGCCTGGGCGGCTACGTGCTGAGCCTGGTGCACGATGTGCGGTTCCACCACTTCCCCATCGAGCGGCAGCTGAACGGCACCTACGCTATCGCTGGCGGCAAGGCCCATTGTGGACCTGCCGAGCTGTGCGAGTTCTACAGCAGAGATCCCGATGGCCTGCCCTGCAACCTGCGGAAGCCCTGCAATAGACCCAGCGGCCTGGAACCTCAGCCCGGCGTGTTCGACTGTCTGAGG…	1470
